# Supplementary material for: Hospitalization costs among Hospital-Acquired Venous Thromboembolism patients in China: a cross-sectional study
Source: Research Square preprint supplement (doi:10.21203/rs.3.rs-2537049/v1), 2023-02-03
Supplement: Supplementary file 1 [file fcbc5d0be2ae184b4f042142.docx]

**Supplementary Table 1.** Uni-variate analysis of hospitalization expenses for HA-VTE inpatients(n=519)

|  | **Cost**  **Median (Q1, Q3)** | **Z/H** | ***P* value** |
| --- | --- | --- | --- |
| **Subtype of VTE** |  | 127.4592) | <0.001 |
| DVT | 3688.26 (2368.36, 5592.84) |  |  |
| PE | 8069.23 (5104.82, 13862.98) |  |  |
| DVT &PE | 13135.89(8136.55, 27010.91) |  |  |
| **Age group** |  | 1.7742) | 0.412 |
| 18–44 years old | 4648.66 (3220.52, 10823.12) |  |  |
| 45–64 years old | 4273.38(2742.86, 7245.05) |  |  |
| 65 years old and above | 4505.41(2720.13, 9469.75) |  |  |
| **Sex** |  | -3.0571) | 0.002 |
| Male | 5125.17(3121.82, 9701.81) |  |  |
| Female | 3893.21(2521.83, 7349.40) |  |  |
| **LoS** |  | 89.2062) | <0.001 |
| 1-9 days | 2588.38 (1585.25, 3758.84) |  |  |
| 10-19 days | 4413.73 (3052.99, 7258.38) |  |  |
| 20 days and above | 8228.65 (4765.91, 16017.83) |  |  |
| **Payment type** |  | 17.9752) | <0.001 |
| UEBMI | 5228.95 (3080.49, 12174.36) |  |  |
| URBMI | 3916.82 (2395.36, 7395.01) |  |  |
| Self-paying | 3865.27 (2866.82, 5199.24) |  |  |
| **Number of surgery** |  | 47.0792) | <0.001 |
| No | 4153.93 (2520.87, 8071.03) |  |  |
| 1-2 | 4702.13 (2983.48, 8348.86) |  |  |
| 3 and above | 40413.34 (35674.86, 44736.82) |  |  |
| **Department** |  | 23.9862) | <0.001 |
| Orthopedics | 4594.51 (2840.31, 9428.96) |  |  |
| Respiratory Medicine | 5863.33 (3084.23, 12235.28) |  |  |
| Neurology | 3879.49 (2533.24, 5414.12) |  |  |
| **Admission Route** |  | 11.0032) | 0.004 |
| Outpatient | 3934.92 (2471.65, 7259.24) |  |  |
| Emergency Care | 5028.36 (3153.14, 10585.57) |  |  |
| Transfer from other | 6176.73 (2288.34, 13019.05) |  |  |
| **N****umber of thromboses** |  | 12.6892) | 0.002 |
| 1-2 | 4209.62 (2594.62, 7738.09) |  |  |
| 3-4 | 6253.88 (3016.91, 15396.24) |  |  |
| 5 and above | 5646.75 (3366.96, 15197.55) |  |  |
| **Number of concomitant diagnoses** |  | 36.0282) | <0.001 |
| 1-3 | 3574.69 (2212.56, 5796.32) |  |  |
| 4-6 | 4178.38 (2478.95, 6769.85) |  |  |
| 7 and above | 7038.75 (3429.60, 15048.05) |  |  |
| **D****isease Transition** |  | 20.4852) | <0.001 |
| Cured | 4688.62 (3003.44, 8487.57) |  |  |
| Improved | 4452.11 (2748.87, 8622.79) |  |  |
| unhealed | 3385.39 (1944.53, 5401.59) |  |  |
| die | 15073.53 (11000.20, 24565.46) |  |  |
| other | 3263.82 (1599.17, 8246.45) |  |  |

1) Wilcoxon rank test; 2) Kruskal–Wallis test.

Abbreviations: Q1, 1st quartile (25%); Q3, 3rd quartile (75%); LoS length of stay; VTE venous thromboembolism; DVT deep vein thrombosis; PE pulmonary embolism,; UEBMI Urban Employee Basic Medical Insurance (to support employed workers); URBMI Urban Resident Basic Medical Insurance (to support urban residents without a stable job); Self-paying means patients pay all hospital fees out of pocket.

**Supplementary Table 2.** Uni-variate analysis of hospitalization expenses for DVT inpatients(n=371)

|  | **Cost**  **Median (Q1, Q3)** | **Z/H** | ***P* value** |
| --- | --- | --- | --- |
| **Age group** |  | 0.0202) | 0.990 |
| 18–44 years old | 3774.97(2809.14, 7463.43) |  |  |
| 45–64 years old | 3861.25 (2408.85, 5474.69) |  |  |
| 65 years old and above | 3437.95(2156.22, 5584.85) |  |  |
| **Sex** |  | -2.5121) | 0.012 |
| Male | 4104.45 (2509.69, 6625.39) |  |  |
| Female | 3429.60 (2252.13, 5046.87) |  |  |
| **LoS** |  | 83.1742) | <0.001 |
| 1-9 days | 2212.56 (1434.87, 3064.11) |  |  |
| 10-19 days | 3735.36 (2545.07, 5228.95) |  |  |
| 20 days and above | 6433.59 (4336.42, 11457.73) |  |  |
| **Payment type** |  | 14.1392) | 0.001 |
| UEBMI | 4138.48 (2543.76, 7432.41) |  |  |
| URBMI | 3343.91 (1970.90, 4810.76) |  |  |
| Self-paying | 3734.50 (2656.09, 5470.22) |  |  |
| **Number of surgery** |  | 76.0292) | <0.001 |
| No | 3112.26 (1973.91, 4630.54) |  |  |
| 1-2 | 4181.95 (2780.10, 6629.36) |  |  |
| 3 and above | 40113.89 (34880.79, 43825.21) |  |  |
| **Department** |  | 26.7182) | <0.001 |
| Orthopedics | 4176.65 (2686.67, 7153.64) |  |  |
| Respiratory Medicine | 2478.95 (1784.79, 3754.70) |  |  |
| Neurology | 3680.01 (2460.40, 4924.69) |  |  |
| **Admission Route** |  | 12.5682) | 0.002 |
| Outpatient | 3345.00 (1976.67, 4921.53) |  |  |
| Emergency Care | 4322.46 (2860.46, 7391.55) |  |  |
| Transfer from other | 2567.00 (1863.80, 6734.25) |  |  |
| **Number of thromboses** |  | 5.1672) | 0.076 |
| 1-2 | 3646.12 (2374.35, 5238.51) |  |  |
| 3-4 | 4413.50 (2144.79, 9240.90) |  |  |
| 5 and above | 4132.31 (2954.07, 7259.24) |  |  |
| **Number of concomitant diagnoses** |  | 1.6452) | 0.439 |
| 1-3 | 3507.69 (2060.76, 5481.76) |  |  |
| 4-6 | 3728.86 (2295.13, 5331.81) |  |  |
| 7 and above | 4173.08 (2585.26, 7295.14) |  |  |
| **Disease Transition** |  | 25.2812) | <0.001 |
| Cured | 4058.88 (2870.07, 7325.95) |  |  |
| Improved | 3766.22 (2460.40, 5592.84) |  |  |
| unhealed | 2848.55 (1582.39, 3892.29) |  |  |
| die | 13623.95 (11293.74, 17088.21) |  |  |
| other | 2307.97 (1367.06, 3186.38) |  |  |

1) Wilcoxon rank test; 2) Kruskal–Wallis test.

Abbreviations: Q1, 1st quartile (25%); Q3, 3rd quartile (75%); LoS length of stay; VTE venous thromboembolism; DVT deep vein thrombosis; PE pulmonary embolism,; UEBMI Urban Employee Basic Medical Insurance (to support employed workers); URBMI Urban Resident Basic Medical Insurance (to support urban residents without a stable job); Self-paying means patients pay all hospital fees out of pocket.

**Supplementary Table 3.** Uni-variate analysis of hospitalization expenses for PE inpatients(n=60)

|  | **Cost**  **Median (Q1, Q3)** | **Z/H** | ***P* value** |
| --- | --- | --- | --- |
| **Age group** |  | 6.2252) | 0.044 |
| 18–44 years old | 10574.38 (6588.38, 17352.30) |  |  |
| 45–64 years old | 10190.22 (6060.48, 13678.80) |  |  |
| 65 years old and above | 7072.78 (4562.59, 13847.83) |  |  |
| **Sex** |  | -0.2561) | 0.798 |
| Male | 8123.42 (4716.05, 14474.81) |  |  |
| Female | 8069.23 (5165.06, 11507.88) |  |  |
| **LoS** |  | 7.6772) | 0.022 |
| 1-9 days | 6955.32 (4258.86, 8898.77) |  |  |
| 10-19 days | 8156.94 (5104.82, 13862.98) |  |  |
| 20 days and above | 13461.81 (6568.75, 38878.51) |  |  |
| **Payment type** |  | 0.1262) | 0.939 |
| UEBMI | 8071.03 (5293.42, 13947.55) |  |  |
| URBMI | 8589.64 (4716.05, 14474.81) |  |  |
| Self-paying | 5105.72 (5105.72, 5105.72) |  |  |
| **Number of surgery** |  | -1.4572) | 0.145 |
| No | 7945.33 (4925.04, 13862.98) |  |  |
| 1-2 | 11594.80 (8643.89, 13885.10) |  |  |
| 3 and above | - |  |  |
| **Department** |  | 1.2992) | 0.522 |
| Orthopedics | 8000.39 (3485.48, 12441.39) |  |  |
| Respiratory Medicine | 8067.42 (5105.12, 13671.17) |  |  |
| Neurology | 11406.18 (5980.47, 43126.84) |  |  |
| **Admission Route** |  | 0.3542) | 0.838 |
| Outpatient | 8246.45 (5104.52, 13955.07) |  |  |
| Emergency Care | 9111.85 (6070.93, 16034.01) |  |  |
| Transfer from other | 6230.89 (3950.68, 12585.37) |  |  |
| **Number of thromboses** |  | -1.0382) | 0.299 |
| 1-2 | 8067.42 (5104.52, 13586.71) |  |  |
| 3-4 | 14308.39 (14308.39, 14308.39) |  |  |
| 5 and above | - |  |  |
| **Number of concomitant diagnoses** |  | 1.1492) | 0.563 |
| 1-3 | 10230.52 (7711.87, 12105.01) |  |  |
| 4-6 | 6211.58 (4945.22, 10066.95) |  |  |
| 7 and above | 8158.74 (4850.56, 16067.44) |  |  |
| **Disease Transition** |  | 1.3762) | 0.848 |
| Cured | 7072.78 (7072.78, 7072.78) |  |  |
| Improved | 8069.23 (4840.39, 13027.87) |  |  |
| unhealed | 5401.59 (4566.47, -) |  |  |
| die | 17655.53 (8000.39, -) |  |  |
| other | 8246.45 (5185.24, 16235.11) |  |  |

1) Wilcoxon rank test; 2) Kruskal–Wallis test.

Abbreviations: Q1, 1st quartile (25%); Q3, 3rd quartile (75%); LoS length of stay; VTE venous thromboembolism; DVT deep vein thrombosis; PE pulmonary embolism,; UEBMI Urban Employee Basic Medical Insurance (to support employed workers); URBMI Urban Resident Basic Medical Insurance (to support urban residents without a stable job); Self-paying means patients pay all hospital fees out of pocket.

**Supplementary Table 4.** Uni-variate analysis of hospitalization expenses for DVT&PE inpatients(n=68)

|  | **Cost**  **Median (Q1, Q3)** | **Z/H** | ***P* value** |
| --- | --- | --- | --- |
| **Age group** |  | 1.9382) | 0.380 |
| 18–44 years old | 30780.77 (13003.65, -) |  |  |
| 45–64 years old | 11615.95 (6383.69, 25893.02) |  |  |
| 65 years old and above | 13253.56 (9109.50, 26652.25) |  |  |
| **Sex** |  | -1.1691) | 0.242 |
| Male | 10890.47 (7693.25, 27190.25) |  |  |
| Female | 15048.05 (10902.08, 27278.85) |  |  |
| **LoS** |  | 14.8522) | 0.001 |
| 1-9 days | 8808.08 (3797.22, 27128.54) |  |  |
| 10-19 days | 10230.98 (6650.47, 16044.66) |  |  |
| 20 days and above | 17764.81 (13135.90, 38456.89) |  |  |
| **Payment type** |  | 8.7622) | 0.013 |
| UEBMI | 14251.45 (10246.45, 31641.15) |  |  |
| URBMI | 13252.74 (8170.17, 19247.54) |  |  |
| Self-paying | 3995.18 (3154.72, -) |  |  |
| **Number of surgery** |  | 8.8022) | 0.012 |
| No | 10890.47 (7470.25, 16591.21) |  |  |
| 1-2 | 20037.26 (12828.82, 37957.99) |  |  |
| 3 and above | 49332.36 (49332.36, 49332.36) |  |  |
| **Department** |  | 6.3252) | 0.042 |
| Orthopedics | 20037.26 (10837.64, 40633.74) |  |  |
| Respiratory Medicine | 10859.16 (7358.74, 16614.13) |  |  |
| Neurology | 14079.07 (10582.28, 35673.17) |  |  |
| **Admission Route** |  | 1.4222) | 0.491 |
| Outpatient | 14274.11 (8136.55, 31641.15) |  |  |
| Emergency Care | 11557.07 (7755.28, 18374.05) |  |  |
| Transfer from other | 16545.36 (10230.98, 29095.44) |  |  |
| **Number of thromboses** |  | 0.1582) | 0.924 |
| 1-2 | 12963.85 (8237.39, 26472.91) |  |  |
| 3-4 | 13011.35 (7888.72, 25867.26) |  |  |
| 5 and above | 15295.48 (6697.69, 35184.19) |  |  |
| **Number of concomitant diagnoses** |  | 4.9132) | 0.086 |
| 1-3 | 4849.28 (3951.41, -) |  |  |
| 4-6 | 14409.37 (10081.23, 37077.21) |  |  |
| 7 and above | 13019.05 (8102.94, 20730.26) |  |  |
| **Disease Transition** |  | 7.4252) | 0.115 |
| Cured | 25164.98 (11545.42, 39719.56) |  |  |
| Improved | 14728.71 (8342.22, 27010.92) |  |  |
| unhealed | 8797.94 (7888.72, 10429.81) |  |  |
| die | 59660.80 (5441.80, 219352.37) |  |  |
| other | 9383.10 (3790.82, 14432.58) |  |  |

1) Wilcoxon rank test; 2) Kruskal–Wallis test.

Abbreviations: Q1, 1st quartile (25%); Q3, 3rd quartile (75%); LoS length of stay; VTE venous thromboembolism; DVT deep vein thrombosis; PE pulmonary embolism,; UEBMI Urban Employee Basic Medical Insurance (to support employed workers); URBMI Urban Resident Basic Medical Insurance (to support urban residents without a stable job); Self-paying means patients pay all hospital fees out of pocket.
